# Supplementary material for: The Earth System Grid Federation (ESGF) Virtual Aggregation (CMIP6 v20240125)
Source: Copernicus journal article supplement (doi:10.5194/gmd-18-2461-2025), 2025-04-30
Supplement: Supplementary file 1 [file gmd-18-2461-2025-supplement.zip]

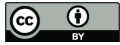

*Supplement of*

## **The Earth System Grid Federation (ESGF) Virtual Aggregation (CMIP6 v20240125)**

**Ezequiel Cimakdevilla et al.**

*Correspondence to:* Ezequiel Cimakdevilla ([ezequiel.cimakdevilla@unican.es](mailto:ezequiel.cimakdevilla@unican.es))

- [gmd-18-2461-2025-supplement-title-page.pdf](#)
- [example.ncml](#)

The copyright of individual parts of the supplement might differ from the article licence.
